# Supplementary material for: N-, Fe-Doped carbon sphere/oriented carbon nanofiber nanocomposite with synergistically enhanced electrochemical activities
Source: Royal Society of Chemistry journal article supplement (doi:10.1039/c6ra20075c), 2016-01-01
Supplement: c6ra20075c1.pdf [file c6ra20075c1.pdf]

## Supporting Information

# N-, Fe-Doped Carbon Spheres/Oriented Carbon Nanofibers Nanocomposite with Synergistically Enhanced Electrochemical Activities

Li Zhang, Wei Wan, Qiang Wang, Wen-Chao Lu, Bei-Hua Hou, and Ping Chen\*

School of Chemistry and Chemical Engineering, Anhui University, Hefei, Anhui,  
230601, P. R. China

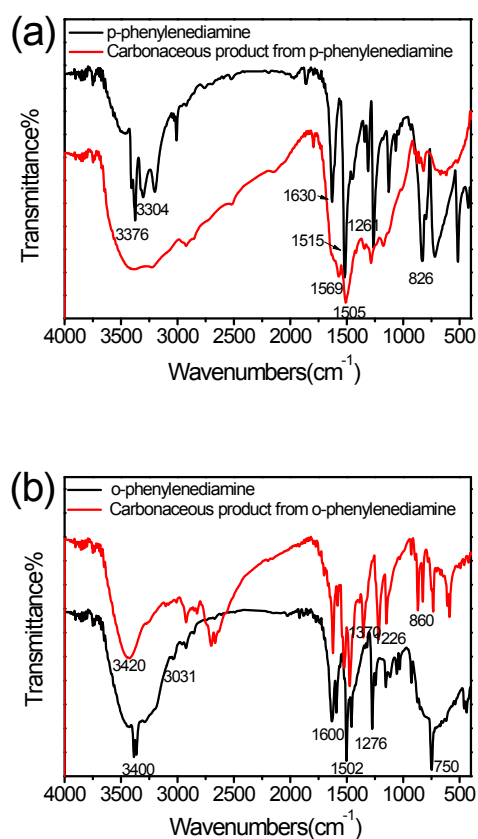

**Figure S1**(a) FTIR Data of p-phenylenediamine and carbonaceous product from p-phenylenediamine(P1); (b) FTIR data of o-phenylenediamine and carbonaceous product from o-phenylenediamine (P2)

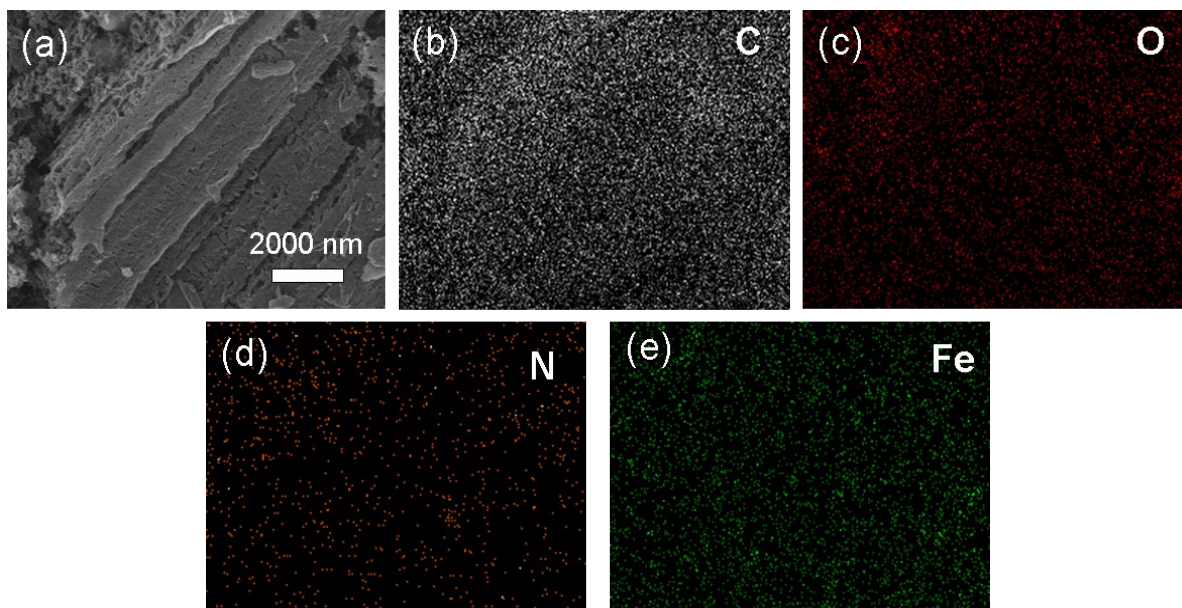

**Figure S2.** (a) SEM image of the NFe-CNF-400; (b-e) carbon, oxygen, nitrogen and ferrum element mappings of the NFe-CNF-400

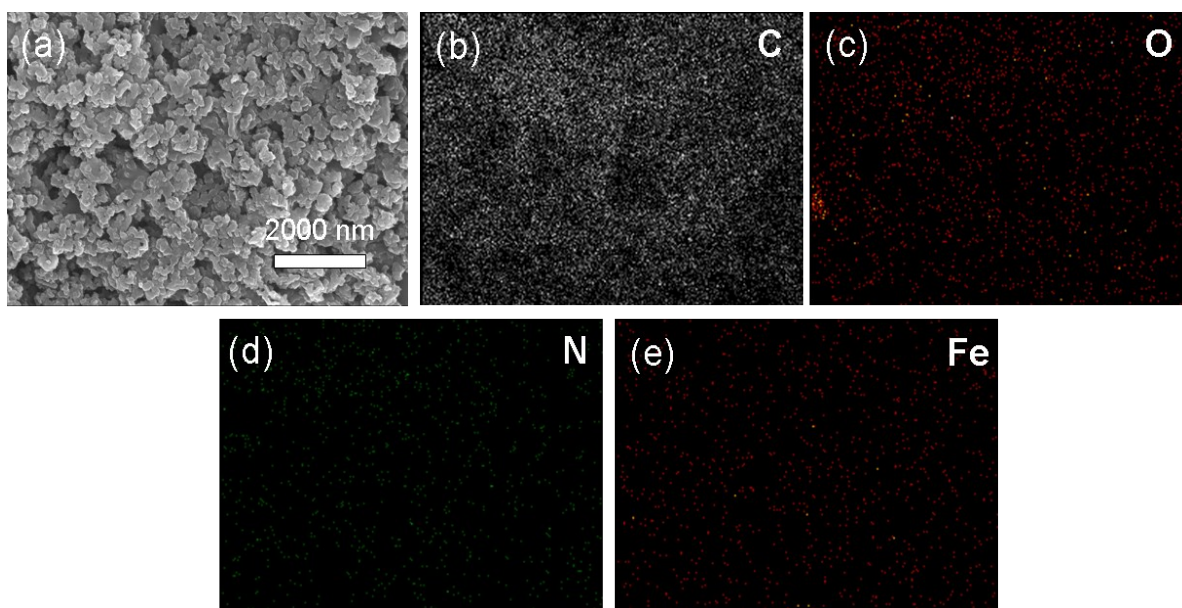

**Figure S3.** (a) SEM image of the NFe-CS-400; (b-e) carbon, oxygen, nitrogen and ferrum element mappings of the NFe-CS-400

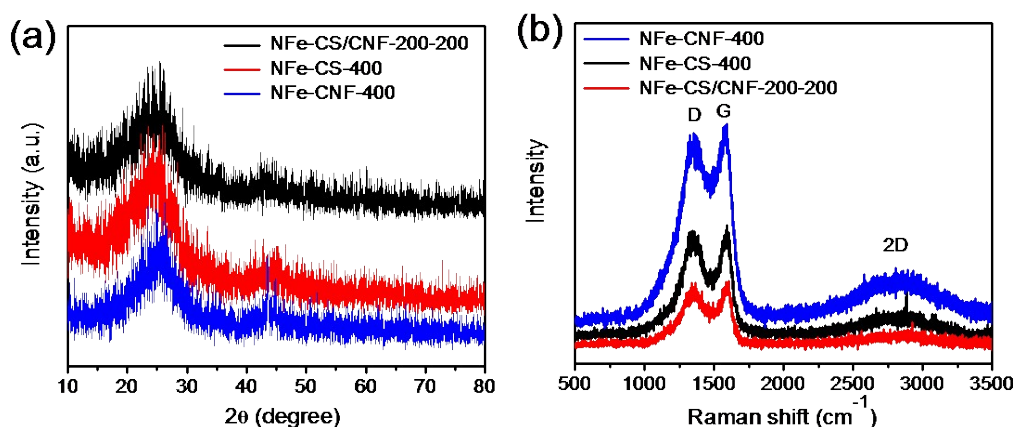

**Figure S4**(a)X-ray diffraction of the NFe-CS-400, NFe-CNF-400 andNFe-CS/CNF-200-200; (b)Raman spectra of the NFe-CS-400, NFe-CNF-400 andNFe-CS/CNF-200-200.

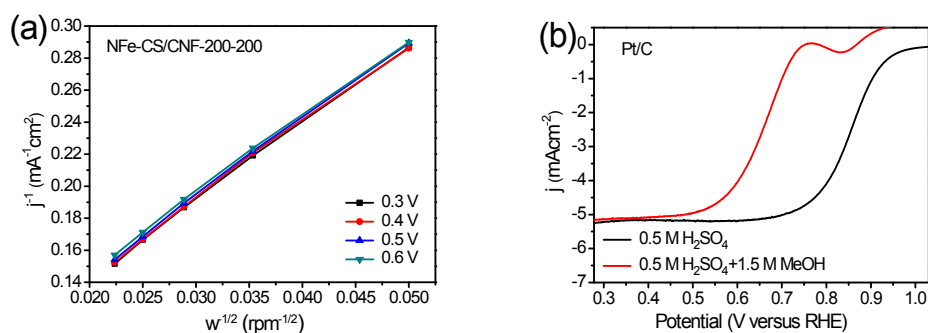

**Figure S5** (a) K-L plots ( $i^{-1}$  vs.  $\omega^{-1/2}$ ) at different electrode potentials at NFe-CS/CNF-200-200 electrode in 0.5 M  $H_2SO_4$ ; (b) ORR polarization curves at Pt/C electrode with or without 1.5 M methanol

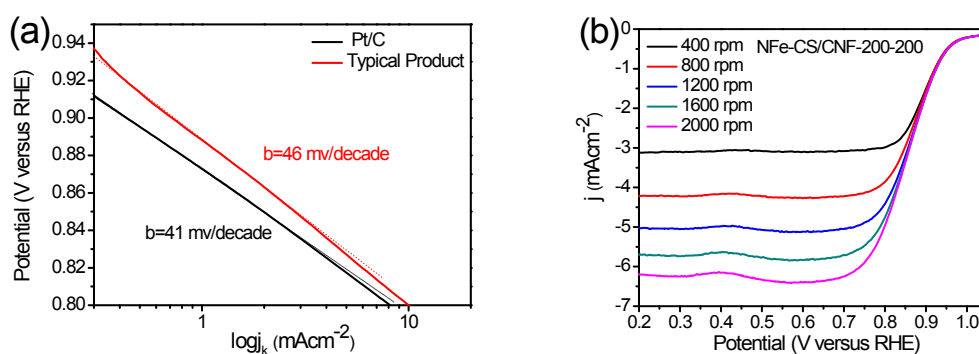

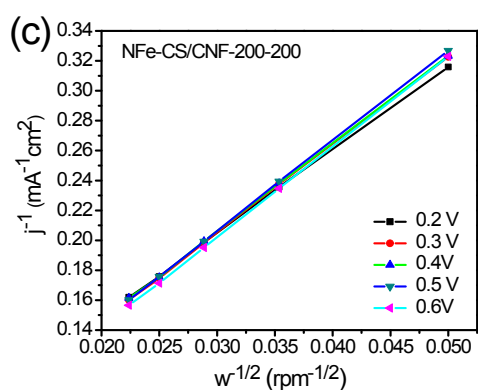

**Figure S6** (a) Tafel plots of the NFe-CS/CNF-200-200 and Pt/C in 0.1 M KOH; (b) ORR polarization curves at NFe-CS/CNF-200-200 electrode at various rotation speeds (sweep rate  $10 \text{ mV s}^{-1}$ ) in  $\text{O}_2$ -saturated 0.1 M KOH; (c) K-L plots at different electrode potentials at NFe-CS/CNF-200-200 electrode in 0.1 M KOH

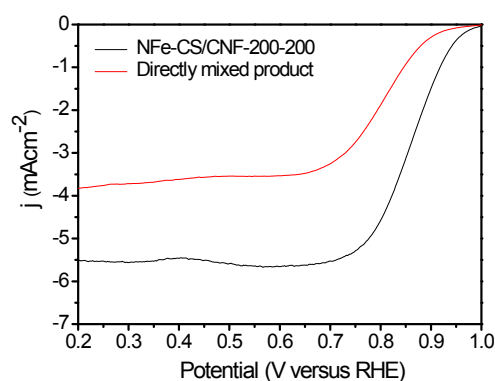

**Figure S7** ORR polarization curves at NFe-CS/CNF-200-200 and directly mixed product of NFe-CS-400 and NFe-CNF-400 electrodes in  $\text{O}_2$ -saturated 0.1 M KOH

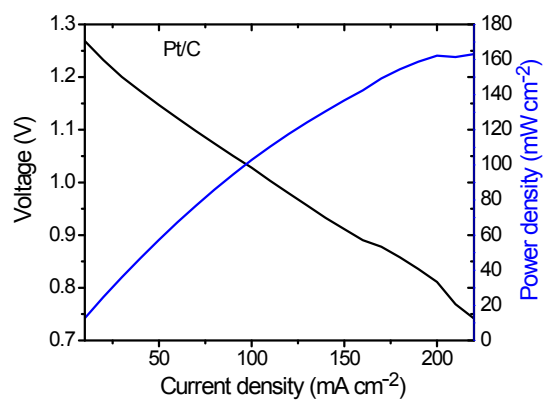

**Figure S8** Polarization curves (V-i) and corresponding power density plots of the batteries using Pt/C at different current density

**Table S1.** Element percentage (C, O, N and Fe), BET surface area, total pore volume and micropore volume of the NFe-CS/CNF-200-200, NFe-CS-400 and NFe-CNF-400.

| Products           | C<br>at.% | O<br>at.% | N<br>at.% | Fe<br>at.% | BET<br>surface<br>area<br>(m <sup>2</sup> /g) | Total pore<br>volume<br>(cm <sup>3</sup> /g) | Micropore<br>volume<br>(cm <sup>3</sup> /g) |
|--------------------|-----------|-----------|-----------|------------|-----------------------------------------------|----------------------------------------------|---------------------------------------------|
| NFe-CS/CNF-200-200 | 91.73     | 3.99      | 3.89      | 0.38       | 625.00                                        | 0.44                                         | 0.28                                        |
| NFe-CS-400         | 91.09     | 5.08      | 3.54      | 0.28       | 417.78                                        | 0.43                                         | 0.17                                        |
| NFe-CNF-400        | 90.18     | 4.78      | 4.32      | 0.72       | 182.64                                        | 0.22                                         | 0.06                                        |
| NFe-CS/CNF-150-250 | 91.1      | 3.83      | 4.53      | 0.54       | 350.60                                        | 0.30                                         | 0.09                                        |
| NFe-CS/CNF-180-220 | 90.13     | 4.80      | 4.59      | 0.49       | 444.58                                        | 0.31                                         | 0.21                                        |
| NFe-CS/CNF-220-180 | 91.65     | 4.38      | 3.52      | 0.45       | 532.5                                         | 0.39                                         | 0.25                                        |
| NFe-CS/CNF-250-150 | 90.91     | 4.84      | 3.79      | 0.46       | 466.83                                        | 0.36                                         | 0.22                                        |
| P1                 | 74.69     | 14.01     | 11.09     | 0.20       | ----                                          | ----                                         | ----                                        |
| P2                 | 78.17     | 5.19      | 16.07     | 0.57       | ----                                          | ----                                         | ----                                        |

The data about element percentage (C, O, N and Fe) were obtained from the XPS results.

**Table S2** Summary of reported ORR performance for nitrogen-doped carbon catalysts in alkaline media

| Sample                        | Electrolyte | Mass loading (mg cm <sup>-2</sup> ) | Onset Potential (mv vs. RHE) | Half-Wave Potential (mv vs. RHE) | Limiting current density (mA cm <sup>-2</sup> ) | Ref.      |
|-------------------------------|-------------|-------------------------------------|------------------------------|----------------------------------|-------------------------------------------------|-----------|
| PtC                           | 0.1M KOH    | 0.2                                 | 932                          | 845                              | 5.62                                            | this work |
| NFe-CS/CNF-200-200            | 0.1M KOH    | 0.2                                 | 950                          | 863                              | 5.73                                            | this work |
| Fe-N-CC                       | 0.1M KOH    | 0.1                                 | 940                          | 830                              | -                                               | 1         |
| FePPc/CNT-1.5                 | 0.1M KOH    | 0.65                                | 1050                         | 930                              | ~5.7                                            | 2         |
| Meso/micro-PoPD               | 0.1M KOH    | 0.5                                 | 900                          | 850                              | 5.8                                             | 3         |
| N-doped mesoporous nanosheets | 0.1M KOH    | 0.6                                 | 970                          | 830                              | 5.45                                            | 4         |
| N-doped carbon spheres        | 0.1M KOH    | 0.25                                | 880                          | -                                | ~5.7                                            | 5         |
| BP-NFe                        | 0.1M KOH    | 0.4                                 | 1060                         | -                                | -                                               | 6         |
| N-Fe-co-doped CNTs            | 0.1M KOH    | 0.485                               | 930                          | 870                              | 5.5                                             | 7         |
| Fe-N-CNFs                     | 0.1M KOH    | 0.6                                 | 0.93                         | -                                | ~5.4                                            | 8         |
| Fe3C@NCN F-900                | 0.1M KOH    | 0.15                                | 980                          | -                                | ~4.5                                            | 9         |

**Table S3** Summary of reported ORR performance for nitrogen-doped carbon catalysts in acidic media

| Sample                      | Electrolyte                          | Mass loading (mg cm <sup>-2</sup> ) | Onset Potential (mv vs. RHE) | Half-Wave Potential(mv vs. RHE) | Limiting current density(mAcm <sup>-2</sup> ) | Ref.      |
|-----------------------------|--------------------------------------|-------------------------------------|------------------------------|---------------------------------|-----------------------------------------------|-----------|
| PtC                         | 0.5M H <sub>2</sub> SO <sub>4</sub>  | 0.2                                 | 930                          | 850                             | 5.2                                           | this work |
| NFe-CS/CNF-200-200          | 0.5M H <sub>2</sub> SO <sub>4</sub>  | 0.2                                 | 860                          | 782                             | 5.48                                          | this work |
| Fe-N-CC                     | 0.5M H <sub>2</sub> SO <sub>4</sub>  | 0.1                                 | 800                          | 520                             | -                                             | 1         |
| FePPc/CNT-1.5               | 0.5M H <sub>2</sub> SO <sub>4</sub>  | 0.65                                | 920                          | 800                             | ~4.8                                          | 2         |
| N-doped Carbon Spheres      | 0.5 M H <sub>2</sub> SO <sub>4</sub> | 0.25                                | 650                          | -                               | ~5.6                                          | 5         |
| N-Fe-codoped CNTs           | 0.1 M HClO <sub>4</sub>              | 0.49                                | 870                          | 730                             | ~5.75                                         | 7         |
| Fe <sub>3</sub> C@NCN F-900 | 0.1 M HClO <sub>4</sub>              | 0.15                                | 780                          | -                               | -                                             | 9         |
| Fe-N-HCMS                   | 0.5 M H <sub>2</sub> SO <sub>4</sub> | 0.25                                | 800                          | ~640                            | 7                                             | 10        |
| MWCNT/C o-porphyrin         | 0.5M H <sub>2</sub> SO <sub>4</sub>  | 0.155                               | 790                          | 660                             | ~3.78                                         | 11        |
| Fe-SPc/KJ300                | 0.1 M HClO <sub>4</sub>              | 0.612                               | 850                          | 610                             | ~5.5                                          | 12        |
| Co-TPFc/MWCNT               | 0.5M H <sub>2</sub> SO <sub>4</sub>  | 0.845                               | 840                          | 560                             | -                                             | 13        |

**Table S4.** Summary of reported performance of Zn-air batteries

| Catalyst                                    | Volatage<br>10mA cm <sup>-2</sup> (V) | Volatage<br>100 mA<br>cm <sup>-2</sup> (V) | Peak<br>power<br>density<br>(mW cm <sup>-2</sup> ) | Specific Capacity                                                                                       | Reference                                |
|---------------------------------------------|---------------------------------------|--------------------------------------------|----------------------------------------------------|---------------------------------------------------------------------------------------------------------|------------------------------------------|
| <b>NFe-<br/>CS/CNF-200-<br/>200</b>         | <b>1.29</b>                           | <b>1.04</b>                                | <b>163.3</b>                                       | <b>717 mAhg<sup>-1</sup>(10mAcm<sup>-2</sup>)</b><br><b>656 mAhg<sup>-1</sup>(100mAcm<sup>-2</sup>)</b> | <b>This work</b>                         |
| N/P co-doped mesoporous nanocarbon          | ~1.17                                 | ----                                       | 55                                                 | 735 mAhg <sup>-1</sup> (5mAcm <sup>-2</sup> )<br>689mAhg <sup>-1</sup> (25mAcm <sup>-2</sup> )          | Nature nanotechnology,2015,10(5),444-452 |
| Meso/micro-PoPD                             | 1.28                                  | 1.01                                       | ----                                               | 630 mAhg <sup>-1</sup> (100mAcm <sup>-2</sup> )                                                         | Nature Commnication, 2014,5 4973         |
| Carbon-Coated Core Shell Fe CuNanoparticles | ~1.28                                 | ~1.1                                       | 212                                                | ----                                                                                                    | Acs Nano 2015, 9, 6493-6501              |
| CoO/N-CNT                                   | 1.3                                   | ~1.11                                      | 265                                                | 570 mAhg <sup>-1</sup> (100mAcm <sup>-2</sup> )                                                         | Nature Commnication 2013,4 1805          |
| MnOx NWs on KB                              | 1.24                                  | 1.04                                       | 190                                                | 295 mAhg <sup>-1</sup> (200mAcm <sup>-2</sup> )                                                         | Nano Lett. 2011, 11,5362-5366            |
| N-carbon nanofiber aerogel                  | 1.25                                  | ----                                       | ----                                               | 615 mAhg <sup>-1</sup> (10mAcm <sup>-2</sup> )                                                          | Nano Energy. 2015, 11, 366-376           |
| MnOx electrodeposited on stainless steel    | 0.81                                  | ----                                       | 27                                                 | ----                                                                                                    | Energy Environ. Sci. 2014 , 7 , 2017     |
| Mn <sub>3</sub> O <sub>4</sub> /graphene    | 1.23                                  | 0.92                                       | 120                                                | ----                                                                                                    | Energy Environ. Sci. 2011, 4, 4148       |

#### References in Supporting information:

1. G. A. Ferrero, K. Preuss, A. Marinovic, A. B. Jorge, N. Mansor, D. J. Brett, A. B. Fuertes, M. Sevilla and M. M. Titirici, *Acs Nano*, 2016.
2. X. X. Wang, B. Wang, J. Zhong, F. P. Zhao, N. Han, W. J. Huang, M. Zeng, J. Fan and Y. G. Li, *Nano Res*, 2016, **9**, 1497-1506.
3. H. W. Liang, X. Zhuang, S. Brüller, X. Feng and K. Müllen, *Nature Communications*, 2014, **5**, 4973-4973.



4. W. Wei, H. W. Liang, K. Parvez, X. D. Zhuang, X. L. Feng and K. Mullen, *Angew Chem Int Edit*, 2014, **53**, 1570-1574.
5. K. L. Ai, Y. L. Liu, C. P. Ruan, L. H. Lu and G. Q. Lu, *Adv Mater*, 2013, **25**, 998-1003.
6. J. Liu, X. J. Sun, P. Song, Y. W. Zhang, W. Xing and W. L. Xu, *Adv Mater*, 2013, **25**, 6879-6883.
7. Y. G. Li, W. Zhou, H. L. Wang, L. M. Xie, Y. Y. Liang, F. Wei, J. C. Idrobo, S. J. Pennycook and H. J. Dai, *Nat Nanotechnol*, 2012, **7**, 394-400.
8. Z. Y. Wu, X. X. Xu, B. C. Hu, H. W. Liang, Y. Lin, L. F. Chen and S. H. Yu, *Angew Chem Int Edit*, 2015, **54**, 8179-8183.
9. G. Ren, X. Lu, Y. Li, Z. Ying, L. Dai and J. Lei, *Acs Applied Materials & Interfaces*, 2016.
10. M. Zhou, C. Z. Yang and K. Y. Chan, *Adv Energy Mater*, 2014, **4**.
11. I. Hijazi, T. Bourgeteau, R. Cornut, A. Morozan, A. Filoramo, J. Leroy, V. Derycke, B. Jusselme and S. Campidelli, *J Am Chem Soc*, 2014, **136**, 6348-6354.
12. W. M. Li, A. P. Yu, D. C. Higgins, B. G. Llanos and Z. W. Chen, *J Am Chem Soc*, 2010, **132**, 17056-17058.
13. Z. J. Wang, H. T. Lei, R. Cao and M. N. Zhang, *Electrochim Acta*, 2015, **171**, 81-88.
